# Supplementary material for: A new method to evaluate temperature vs. pH activity profiles for biotechnological relevant enzymes
Source: PubMed Central journal article supplement (PMC5637330; doi:10.1186/s13068-017-0923-9), 2017-10-11

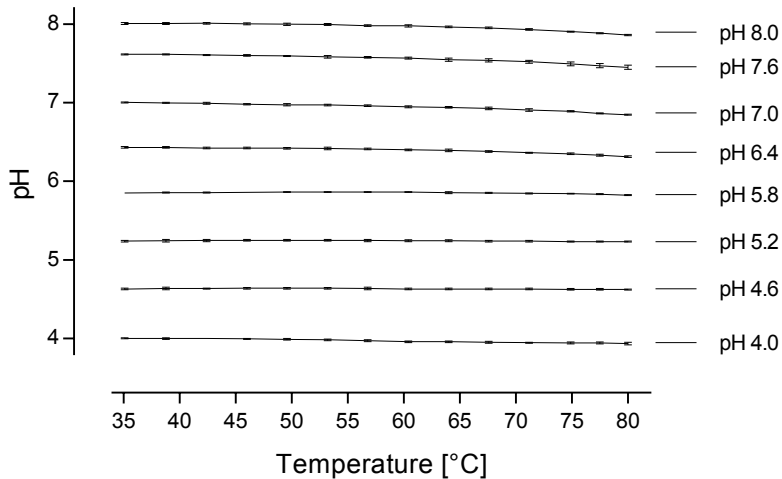

Supplement: 13068_2017_923_MOESM4_ESM.pdf [file 13068_2017_923_MOESM4_ESM.pdf]
